# Supplementary material for: Revealing the role of phosphoric acid in all-vanadium redox flow batteries with DFT calculations and in situ analysis
Source: Royal Society of Chemistry journal article supplement (doi:10.1039/c8cp04517h), 2018-01-01
Supplement: c8cp04517h1.pdf [file c8cp04517h1.pdf]

## SUPPORTING INFORMATION

---

### Supporting Information

#### Revealing the Role of Phosphoric Acid in All-Vanadium Flow Batteries with DFT Calculations and *In situ* Analysis

Fabio J. Oldenburg, Marta Bon, Daniele Perego, Daniela Polino, Teodoro Laino, Thomas J. Schmidt and Lorenz Gubler

**Abstract** The present work suggests the use of a mixed water-based electrolyte containing sulfuric and phosphoric acid for both negative and positive electrolytes of a vanadium redox flow battery. Computational and experimental investigations reveal insights on the possible interactions between the vanadium ions in all oxidation states and sulphate, bisulphate, dihydrogen phosphate ions and phosphoric acid. *In situ* cycling experiments and ion-specific electrochemical impedance measurements confirmed a significant lowering of the charge-transfer resistance of the reduction of V(III) ions and consequent increase of the voltaic efficiency associated with the negative side of the battery. This increase of performance is attributable to the complexation of this oxidation state by phosphoric acid. So far, mixed acids have mainly been discussed with the focus on V(V) solubility. In this work we rationalize the impact of the mixed acids on the electrochemical efficiency opening new strategies on how to improve the cycling performance with ionic additives.

|                                                            |    |
|------------------------------------------------------------|----|
| Validation of Electrochemical Impedance Spectroscopy ..... | 2  |
| Experimental Raman Spectra .....                           | 3  |
| Computational Raman Spectra .....                          | 3  |
| 400-2000 cm <sup>-1</sup> .....                            | 4  |
| 2000-4000 cm <sup>-1</sup> .....                           | 12 |
| References .....                                           | 18 |
| Author Contributions .....                                 | 18 |

## SUPPORTING INFORMATION

### Validation of Electrochemical Impedance Spectroscopy

For validation, the sum of the polarization resistance obtained from both half-cells separately was compared to the resistance obtained for the full cell set-up. Both resistances were obtained from the x-axis intersection of the fitted curve. The fit was calculated based on an ohmic resistance ( $R_s$ ) and an electrochemical double-layer, the latter represented with a polarization resistance ( $R_{CT}$ ) in parallel with a constant phase element (CP) (Figure S1).

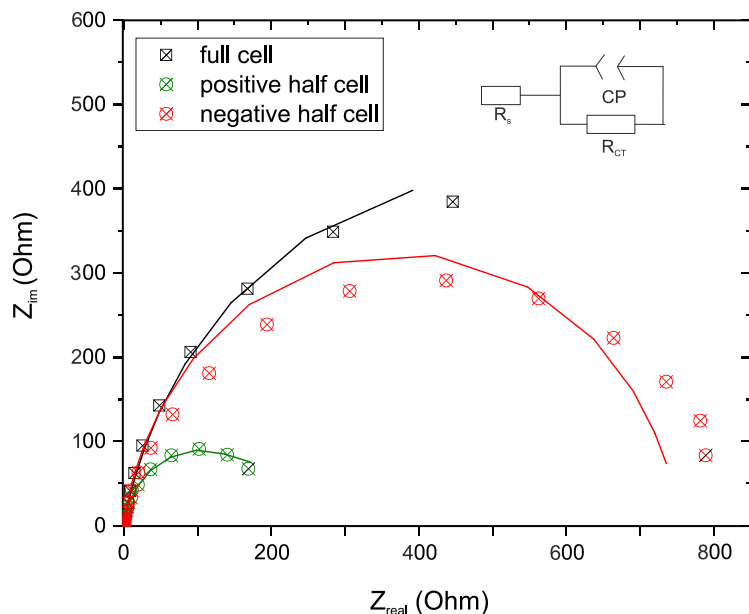

**Figure S1.** Electrochemical impedance spectra of a fully discharged vanadium flow battery cell (determined between 100 kHz-1 mHz at 0 V vs. open circuit potential with a voltage amplitude of 100 mV). The full cell impedance was measured between the two half-cells, whereas the impedance of one half-cell was measured with a Hg/Hg<sub>2</sub>SO<sub>4</sub>-reference electrode (edge-type set-up, 2 M H<sub>2</sub>SO<sub>4</sub> electrolyte).

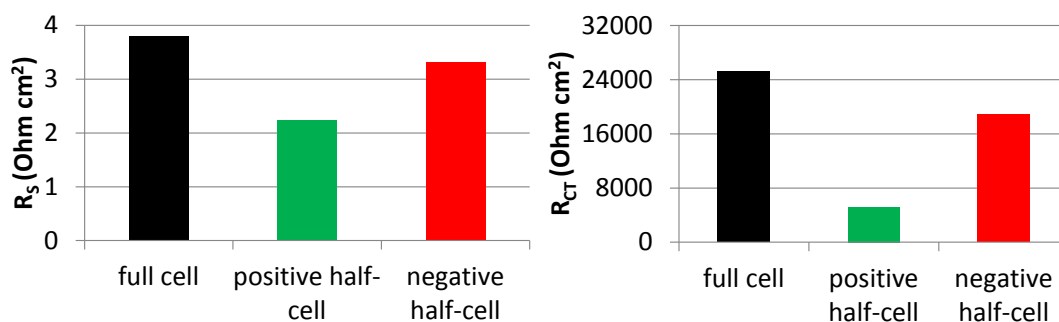

**Figure S2.** Polarization and ohmic resistance of the full cell and each half-cell, respectively, determined from the x-axis intersection of the fitted nyquist plot from figure S1.

### Configurations

The compressed file configurations.tar.gz contains the structures reported in Schemes 1- 4 of the manuscript, in .xyz format, named after Scheme S1.

## SUPPORTING INFORMATION

### Experimental Raman Spectra

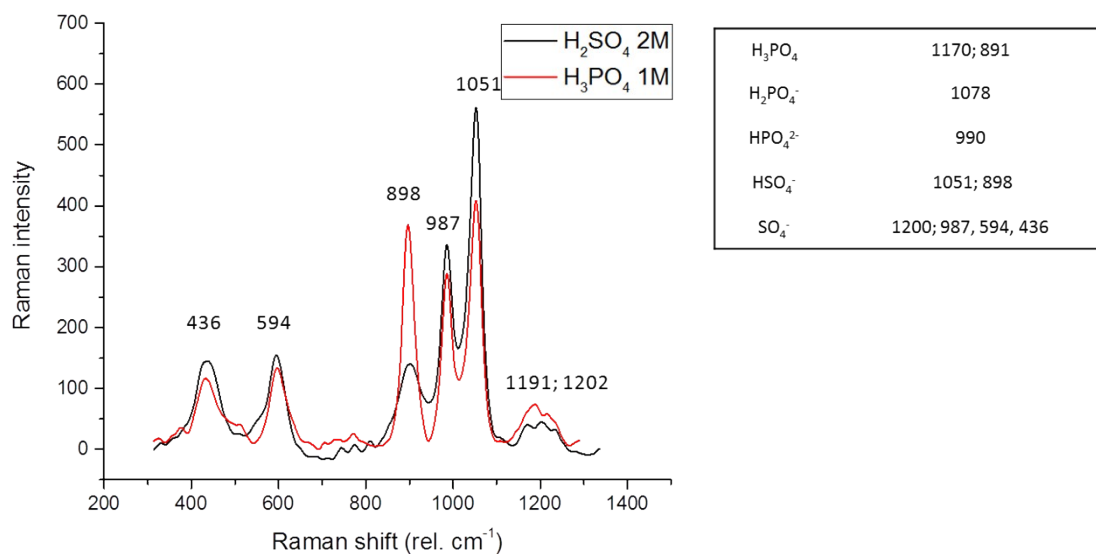

**Figure S3.** Raman spectra of a solution of 2 M sulphuric acid (black) and 1 M phosphoric acid (black) with the assigned Raman shifts.<sup>1</sup>

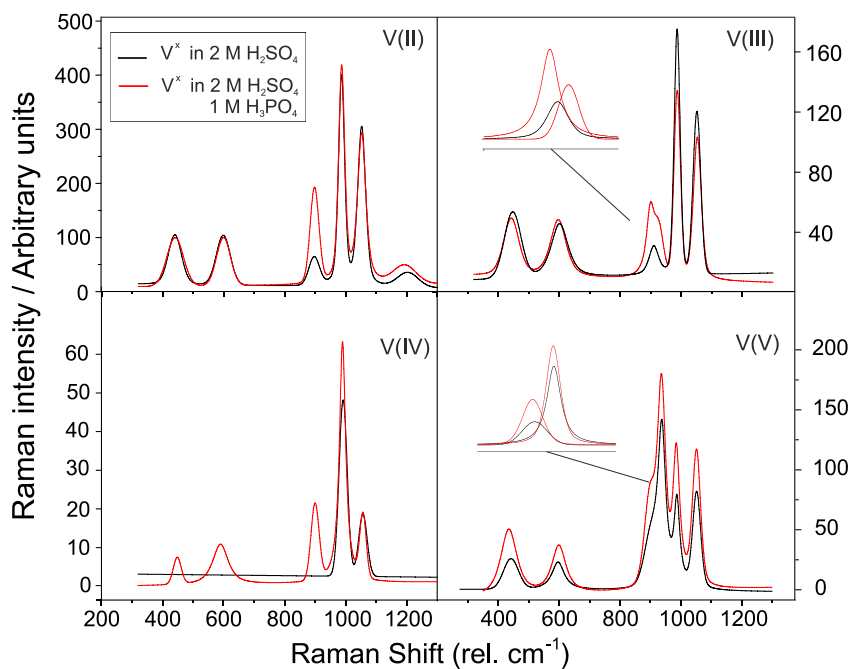

**Figure S4.** Raman spectra of vanadium II-V dissolved in 2 M sulphuric acid (black) and in a mixed acid solution of 2 M sulphuric acid and 1 M phosphoric acid.

## SUPPORTING INFORMATION

### Computational Raman Spectra

The Raman spectra calculated for the configurations of  $V^{2+}$  with the lowest energy in the vicinity of sulfate and phosphate groups are shown in Figures S5 and S9. The ones for  $V^{3+}$  are shown in Figures S6 and S10, while Raman spectra for  $VO^{2+}$  are reported in Figures S7 and S11. Finally, Raman spectra for configurations of  $VO_2^+$  are shown in Figures S8 and S12.

We comment separately two different wavenumber ranges: While the former (in Figures S5-S9), at 400-2000  $cm^{-1}$ , is generated by O-S, O-P, O-V stretching and to the H-O-H bending, the latter (in Figures S10-S12), at 2000-4000  $cm^{-1}$  includes mainly the O-H stretching modes.

#### 400-2000 $cm^{-1}$

**$V^{2+}$ .** As it can be seen from Figure S3, the  $H_3PO_4 / H_2PO_4^-$  produces two distinct P-O stretching signals, the former at 799-814  $cm^{-1}$  (symmetrical), the latter at 1146-1157  $cm^{-1}$  (antisymmetrical). The S-O stretching signal of  $SO_4^{2-}$  (Figures S5.a and S5.c) generates two different fingerprints: at about 865  $cm^{-1}$  (symmetrical), and 1125  $cm^{-1}$  (antisymmetrical). In some configurations the former signal is overlapping with the corresponding H-O-S bending vibration, with the hydrogen being donated by  $H_2O$  (at 926  $cm^{-1}$  and 865-871  $cm^{-1}$  for Conf.1 and Conf.3, respectively). This H-O-S bending vibration is not visible in Figure S5.c, but is present in Figure S5.d, referring to the H-bond between  $HSO_4^-$  and  $H_2O$  (shifted to 719-770  $cm^{-1}$ ). Within the protonation of  $SO_4^{2-}$ , the symmetrical O-S stretching is shifted to higher wavenumbers (from 865  $cm^{-1}$  to 966-971  $cm^{-1}$ ). However, the absorption of the antisymmetrical stretching vibration remains largely unaffected.

When comparing the signals from the free additives compared to the ones which are present in the first solvation shell of vanadium we noticed the following:

1. No shift is visible from the case in which the additive is free (Confs. 1 and 2) compared to the case in which it is complexing  $V^{2+}$  (Confs. 3 and 4).
2. No new signal appears when the additives are bound to vanadium.

**$V^{3+}$ .** In Figure S4 the P-O stretching fingerprints of  $H_3PO_4 / H_2PO_4^-$  are visible, although in an energy range slightly different compared to the case of  $V^{2+}$ . In fact, the P-O stretching of  $H_3PO_4$  can be assigned to an absorption peak in the range of 779-829  $cm^{-1}$  (symmetrical) and 1048-1179  $cm^{-1}$  (antisymmetrical) (Figures S6.a and S6.b). In presence of  $H_2PO_4^-$  (Figures S6.c and S6.d), we observe three fingerprints: the symmetrical stretching vibration at 779-815  $cm^{-1}$ , and two antisymmetrical stretching vibrations at 1098-1192  $cm^{-1}$  (as for  $H_3PO_4$ ) and one at 920-940  $cm^{-1}$ .

The S-O stretching peaks  $SO_4^{2-}$  are shifted towards higher wavenumbers on the right compared to those in Figure S5. The symmetrical vibration appears within a range of 870-970  $cm^{-1}$  whereas the antisymmetrical is within in a range of 1060-1170  $cm^{-1}$ . Sometimes, for some configurations, the former signal is overlapping with the H-O-S bending absorption corresponding to an H-bond between one  $H_2O$  and a  $SO_4^{2-}$ -ion (900-930  $cm^{-1}$ ). Moreover, we noticed that a third peak appears when  $SO_4^{2-}$  is bound to  $V^{3+}$  at about 600  $cm^{-1}$ . As for the  $V^{2+}$  case, the symmetrical O-S stretching is shifted towards higher wavenumbers after the protonation of  $SO_4^{2-}$  and the formation of  $HSO_4^-$  (from 870  $cm^{-1}$  to about 960  $cm^{-1}$ ). In contrast to  $V^{2+}$ , in Figure S6 we observe a third peak corresponding to the S-OH bond stretching of  $HSO_4^-$  at lower wavenumbers (680-793  $cm^{-1}$ ). Furthermore, an intense absorption peak appears at 587  $cm^{-1}$ , which corresponds to the V-OH stretching vibration.

When analyzing how the signals shift between the free additives and the bound ones we made the following observations.

Case A:

- No shift is observed from the absorption peak of free additive (Confs. 1 and 2) to the absorption peaks of complexing additives (Confs. 3 and 4)

Case B:

- the absorption assigned to the free symmetrical  $H_3PO_4$  bond stretching at about 800  $cm^{-1}$  is slightly blue-shifted to 830  $cm^{-1}$  in the bound state (Confs. 3 and 4).
- The absorption assigned to the free antisymmetrical  $H_3PO_4$  bond stretching vibration at about 1180  $cm^{-1}$  is red-shifted (1048-1105  $cm^{-1}$ ) in the bound state (Confs. 3 and 4).
- The absorption assigned to the S-OH bond stretching vibration of  $HSO_4^-$  in the free state (Confs. 1 and 3), at about 680-690  $cm^{-1}$ , shifts to the right at 780-750  $cm^{-1}$  for Conf.2 and Conf.4.
- The signal assigned to the free symmetrical  $HSO_4^-$  S-O bond stretching is located at 964  $cm^{-1}$  (Confs. 1 and 3) and red-shifts to 906-916  $cm^{-1}$  when complexing  $V^{3+}$  (Confs. 2 and 4).
- The signal corresponding to the antisymmetrical  $HSO_4^-$  vibration at 1060-1044  $cm^{-1}$  gets more intense when complexing  $V^{3+}$  (Confs. 2 and 4).

Case C

- No shift is visible for the  $H_2PO_4^-$  additive.

## SUPPORTING INFORMATION

- The signal corresponding to the free symmetrical stretching of  $\text{SO}_4^{2-}$  is found at  $877\text{ cm}^{-1}$  (Conf.1). This signal however shifts towards higher wavenumbers ( $946\text{ cm}^{-1}$ ), when it is complexing  $\text{V}^{3+}$  (Conf.2).
- The signal corresponding to the antisymmetrical  $\text{SO}_4^{2-}$  vibration does not shift significantly, but is intensified when the additive is bound to  $\text{V}^{3+}$  (Confs.2 and 4).

### Case D

- No shift is visible for the  $\text{H}_2\text{PO}_4^-$  additive.
- The signal corresponding to the  $\text{HSO}_4^-$  antisymmetrical mode at  $1054\text{ cm}^{-1}$  is more evident when complexing  $\text{V}^{3+}$  (Conf.4)

**$\text{VO}^{2+}$ .** Many similarities are found between the calculated spectra of  $\text{V}^{3+}$  (Figure S6) and of  $\text{VO}^{2+}$  (Figure S7). In this case, again two distinct signals corresponding to the P-O stretching vibrations of  $\text{H}_3\text{PO}_4$  are visible. The symmetrical one is located between  $777\text{--}835\text{ cm}^{-1}$ , while the antisymmetrical appears between  $1078\text{--}1182\text{ cm}^{-1}$ . For  $\text{H}_2\text{PO}_4^-$  we observe three signals: One corresponding to the symmetrical stretching at  $798\text{--}812\text{ cm}^{-1}$  and two referring to the antisymmetrical stretching, at  $1090\text{--}1171\text{ cm}^{-1}$  (similarly to  $\text{H}_3\text{PO}_4$ ) and at  $937\text{--}1001\text{ cm}^{-1}$ . The S-O stretching of  $\text{SO}_4^{2-}$  (Figures S7.a and S7.c) generates two different fingerprints in the wavenumber ranges of  $830\text{--}947\text{ cm}^{-1}$  (symmetrical) and  $1130\text{--}1160\text{ cm}^{-1}$  (antisymmetrical). The former signal overlaps with the one corresponding to the H-O-S bending vibration at  $1072\text{--}1098\text{ cm}^{-1}$  (Conf.3 in Figure S7.c) and at  $970\text{--}1018\text{ cm}^{-1}$  (Conf.3 in Figure S7.a). The same signal is present also in Figure S7.b, although produced by the H-bonding between  $\text{HSO}_4^-$  and  $\text{H}_2\text{O}$  and shifted towards lower wavenumbers ( $745\text{--}799\text{ cm}^{-1}$ ). Noticeably, as for Figure S6, also in this case a third signal is visible when  $\text{SO}_4^{2-}$  complexes  $\text{VO}^{2+}$ . This signal however, is blue-shifted compared to Figure S6, moving from  $600\text{ cm}^{-1}$  to  $755\text{--}848\text{ cm}^{-1}$ . As we have observed in Figures S5 and Figure S6, the symmetrical S-O stretching vibration of  $\text{HSO}_4^-$  shifts to higher energies compared to  $\text{SO}_4^{2-}$ , (from  $830\text{--}947\text{ cm}^{-1}$  to  $892\text{--}973\text{ cm}^{-1}$ ), while the signal of the antisymmetrical stretching vibration appears at  $1042\text{--}1075\text{ cm}^{-1}$  only when  $\text{HSO}_4^-$  complexes  $\text{VO}^{2+}$  in Confs.2 and 4 of Figure S7.d. Similarly to the case of Figure S6, again we observe a third peak corresponding to the S-OH bond stretching of  $\text{HSO}_4^-$  at lower wavenumbers ( $699\text{--}757\text{ cm}^{-1}$ ).

Furthermore, in the case of  $\text{VO}^{2+}$  an additional fingerprint appears in the range of  $985\text{--}1084\text{ cm}^{-1}$  corresponding to the stretching vibration of the V-O bond.

The following differences are observed between the spectra containing the free additives and the ones with bound additives:

### Case A:

- The signal assigned to the free symmetrical  $\text{H}_3\text{PO}_4$  bond stretching at about  $780\text{ cm}^{-1}$  is blue-shifted to  $830\text{ cm}^{-1}$  in the bound state (Confs. 3 and 4).
- The signal assigned to the free antisymmetrical  $\text{H}_3\text{PO}_4$  bond stretching at about  $1170\text{--}1180\text{ cm}^{-1}$  is shifted to lower wavenumbers ( $1074\text{--}1078\text{ cm}^{-1}$ ) in the bound state (Confs. 3 and 4).
- The signal corresponding to the free symmetrical stretching of  $\text{SO}_4^{2-}$  is found between  $830\text{--}870\text{ cm}^{-1}$  (Confs. 1 and 3). This signal however shifts towards higher wavenumbers ( $900\text{--}946\text{ cm}^{-1}$ ), when it is complexing  $\text{VO}^{2+}$  (Confs. 2 and 4).
- The signal corresponding to the antisymmetrical  $\text{SO}_4^{2-}$  vibration does not shift significantly.
- A new signal appears when  $\text{SO}_4^{2-}$  is bound to  $\text{VO}^{2+}$  at  $755\text{ cm}^{-1}$  for Conf.2 and at  $848\text{ cm}^{-1}$  for Conf.4.
- The V-O stretching signal shifts in Conf.4, from  $1035\text{--}1053\text{ cm}^{-1}$  to  $970\text{--}1010\text{ cm}^{-1}$ , overlapping with the signal produced by the H-bonding between  $\text{SO}_4^{2-}$  and  $\text{H}_2\text{O}$ .

### Case B:

- The signal assigned to the free symmetrical  $\text{H}_3\text{PO}_4$  bond stretching at about  $804\text{--}818\text{ cm}^{-1}$  is shifted to a slightly higher wavenumber range ( $830\text{--}835\text{ cm}^{-1}$ ) in the bound state (Confs. 3 and 4).
- The signal assigned to the free antisymmetrical  $\text{H}_3\text{PO}_4$  bond stretching between  $1150\text{--}1160\text{ cm}^{-1}$  is red-shifted ( $1080\text{--}1090\text{ cm}^{-1}$ ) in the bound state (Confs. 3 and 4).
- The signals assigned to the S-OH bond stretching of  $\text{HSO}_4^-$  do not show any significant shift.
- The signal assigned to the free symmetrical  $\text{HSO}_4^-$  S-O bond stretching is located at  $964\text{ cm}^{-1}$  (Confs. 1 and 3) and shifts to a lower wavenumber of  $923\text{ cm}^{-1}$  when it complexes the  $\text{VO}^{2+}$ -ion alone (Conf. 2). The same shift is not observed when both  $\text{H}_3\text{PO}_4$  and  $\text{HSO}_4^-$  are bound to  $\text{VO}^{2+}$ .
- The V-O stretching signal is found at higher energies compared to Case A ( $1084\text{ cm}^{-1}$ ) in the unbounded state. Moreover, when  $\text{H}_3\text{PO}_4$  complexes  $\text{VO}^{2+}$  the VO signal shifts to a lower wavenumber of  $1048\text{ cm}^{-1}$  which is found to be even lower when both  $\text{H}_3\text{PO}_4$  and  $\text{HSO}_4^-$  are present in the first solvation shell ( $1018\text{ cm}^{-1}$ ).

### Case C

- The antisymmetrical signal of  $\text{H}_2\text{PO}_4^-$  in the unbound state is located at  $951\text{ cm}^{-1}$ . Interestingly, this signal does not shift in comparison to the unbound state of  $\text{H}_2\text{PO}_4^-$ , however it is shifted to higher energies when  $\text{SO}_4^{2-}$  is bounded to  $\text{VO}^{2+}$  ( $994\text{ cm}^{-1}$  for Conf.2 and to  $1023\text{ cm}^{-1}$  for Conf.4).
- The signal corresponding to the free symmetrical stretching of  $\text{SO}_4^{2-}$  is found at  $885\text{ cm}^{-1}$  (Conf.1). This signal however shifts towards higher wavenumbers ( $929\text{ cm}^{-1}$ ) when it is complexing  $\text{VO}^{2+}$  (Confs.2 and 4).

## SUPPORTING INFORMATION

- A new signal appears when  $\text{SO}_4^{2-}$  is bound to  $\text{VO}^{2+}$  at  $791\text{ cm}^{-1}$  for Conf.2 and at  $806\text{ cm}^{-1}$  for Conf.4.
- The signal corresponding to the V-O stretching is located between  $1051\text{--}1058\text{ cm}^{-1}$  in all configurations except for Conf.4, for which this signal is shifted towards lower wavenumbers ( $985\text{ cm}^{-1}$ ) and overlaps with the antisymmetrical P-O-stretching vibration of  $\text{H}_2\text{PO}_4^-$ .

### Case D

- One of the antisymmetrical signal of  $\text{H}_2\text{PO}_4^-$  in the unbound state is located at  $974\text{ cm}^{-1}$ . Interestingly, this signal appears not to be shifted in comparison to the bound state of  $\text{H}_2\text{PO}_4^-$ , except for the case when  $\text{HSO}_4^-$  is bounded to  $\text{VO}^{2+}$  (here moving to higher energies if only  $\text{HSO}_4^-$  is bound ( $1001\text{ cm}^{-1}$  for Conf.2) and to lower energies when both additives complex  $\text{VO}^{2+}$  ( $937\text{ cm}^{-1}$  for Conf.4).
- The signal assigned to the free symmetrical S-O-bond-stretching of  $\text{HSO}_4^-$  is located at a range of  $958\text{--}973\text{ cm}^{-1}$  (Confs.1 and 3) and is shifted towards lower wavenumbers of  $892\text{--}914\text{ cm}^{-1}$  when it complexes  $\text{VO}^{2+}$  (Confs.2 and 4).
- The signals assigned to the S-OH bond stretching of  $\text{HSO}_4^-$  in the free state (Confs.1 and 3), between  $699\text{--}706\text{ cm}^{-1}$ , shift to  $831\text{ cm}^{-1}$  for Conf.2 and  $757\text{ cm}^{-1}$  for Conf.4 of Figure S3.d.
- The location of the V-O signal does not vary from the unbound to the bound state. However, when  $\text{HSO}_4^-$  (Conf.2) or  $\text{H}_2\text{PO}_4^-$  (Conf.3) are bound the signal width increases as it overlaps with the internal S-O and P-O stretching modes of the two additives.

**$\text{VO}_2^+$ .** As found for the previous cases, we observe two signals corresponding to  $\text{H}_3\text{PO}_4$ : the symmetrical P-O stretching vibration located in the wavenumber range of  $807\text{--}853\text{ cm}^{-1}$  and the antisymmetrical vibration located in the range of  $989\text{--}1148\text{ cm}^{-1}$ . A third peak appears when  $\text{H}_3\text{PO}_4$  complexes  $\text{VO}_2^+$  in Confs.3 and 4 of Figure S8.b at  $999$  and  $909\text{ cm}^{-1}$  respectively. For  $\text{H}_2\text{PO}_4^-$  again we observe three peaks: the former corresponds to the symmetrical stretching of the P-O bond, and is similar to that of  $\text{H}_3\text{PO}_4$ , at  $796\text{--}848\text{ cm}^{-1}$ . The other two signals correspond to the antisymmetrical stretching vibrations and are located between  $1096\text{--}1203\text{ cm}^{-1}$  (similarly to  $\text{H}_3\text{PO}_4$ ) and between  $910\text{--}1009\text{ cm}^{-1}$ . It is interesting to note that in Conf.4 of Figure S8.a we observe another peak associated to  $\text{H}_2\text{PO}_4^-$  at  $692\text{ cm}^{-1}$ . This signal corresponds to the P-OH-V vibration, and it can be associated to this peculiar case in which the phosphorus atom bonds vanadium through an OH group and not a simple oxygen atom. Similar to  $\text{H}_3\text{PO}_4$ , also for the coordination of  $\text{H}_2\text{PO}_4^-$  (Confs.3 and 4) a new stronger peak appears in the range of  $879\text{--}922\text{ cm}^{-1}$  which corresponds to the P-OV stretching.

Three peaks for the S-O stretching vibration produced by  $\text{SO}_4^{2-}$  are visible. One associated with the symmetrical stretching at a range of  $935\text{--}960\text{ cm}^{-1}$  and two referring to the antisymmetrical stretching vibration ( $1071\text{--}1110\text{ cm}^{-1}$  and  $1155\text{--}1168\text{ cm}^{-1}$ ). Moreover, we noticed that another peak appears when  $\text{SO}_4^{2-}$  is bounded to  $\text{VO}_2^+$  at about  $620\text{--}768\text{ cm}^{-1}$ . Considering  $\text{HSO}_4^-$ , the symmetrical S-O stretching is observed between  $922\text{--}959\text{ cm}^{-1}$ . Often this signal overlaps with the one corresponding to the bending of the hydrogen bond between  $\text{HSO}_4^-$  and  $\text{H}_2\text{O}$  ( $940\text{--}968\text{ cm}^{-1}$ ). Two antisymmetrical S-O stretching vibrations are found also in this case, which are located at  $1052\text{--}1113\text{ cm}^{-1}$  and  $1165\text{--}1240\text{ cm}^{-1}$ . Similar to what we observed in previous cases, also here another peak appears at  $714\text{--}809\text{ cm}^{-1}$  that corresponds to the stretching vibration of the S-OH bond.

In the case of  $\text{VO}_2^+$ , two additional signals are visible: one at  $890\text{--}982\text{ cm}^{-1}$  corresponding to the antisymmetrical V-O stretching and one at  $989\text{--}1051\text{ cm}^{-1}$  corresponding to the symmetrical stretching vibration of the V-O bond.

In the comparative analysis of the bound and the unbound states, it is important to underline that the sulfate group in the unbound state is always protonated after the geometry optimization calculation. For this reason we do not have information about the signals of the free  $\text{SO}_4^{2-}$  and we cannot discern if a shift between the free and the bound state occurs. In this framework, we made the following observations.

### Case A:

- Passing from the free to the bound state,  $\text{H}_3\text{PO}_4$  loses one H atom becoming  $\text{H}_2\text{PO}_4^-$  and hence a direct comparison is not possible. However, since the signal assigned to the symmetrical free  $\text{H}_2\text{PO}_4^-$  is very close to that of  $\text{H}_3\text{PO}_4$ , we may still notice a shift. In fact, in the bound state (Confs. 3 and 4) the symmetrical P-O stretching of  $\text{H}_2\text{PO}_4^-$  is blue-shifted and appears in the range of  $824\text{--}848\text{ cm}^{-1}$ .
- Additionally in this case a direct comparison between the free and the bound antisymmetrical  $\text{H}_3\text{PO}_4$  bond stretching is not possible. The signal assigned to the free antisymmetrical  $\text{H}_3\text{PO}_4$  is located at about  $1140\text{ cm}^{-1}$ . However in the bound state, passing from  $\text{H}_3\text{PO}_4$  to  $\text{H}_2\text{PO}_4^-$  we find one lower wavenumber at  $1118\text{ cm}^{-1}$ , when only  $\text{H}_2\text{PO}_4^-$  complexes  $\text{VO}_2^+$  and a higher one at  $1203\text{ cm}^{-1}$ , when both  $\text{H}_2\text{PO}_4^-$  and  $\text{SO}_4^{2-}$  are complexing the vanadium oxide.
- A new signal appears when  $\text{SO}_4^{2-}$  is bound to  $\text{VO}^{2+}$  at  $768\text{ cm}^{-1}$  for Conf.2 and at  $747\text{ cm}^{-1}$  for Conf.4.
- No shifts are observed for the V-O signals.

### Case B:

- The signal assigned to the free symmetrical  $\text{H}_3\text{PO}_4$  bond stretching at about  $807\text{--}814\text{ cm}^{-1}$  is blue-shifted ( $853\text{--}839\text{ cm}^{-1}$ ) in the bound state (Confs. 3 and 4).
- The signal assigned to the free antisymmetrical  $\text{H}_3\text{PO}_4$  bond stretching in the range of  $1135\text{--}1148\text{ cm}^{-1}$  is red-shifted ( $989$  and  $1082\text{ cm}^{-1}$  in Confs. 3 and 4, respectively).

## SUPPORTING INFORMATION

---

- A new signal appears when  $\text{H}_3\text{PO}_4$  complexes the vanadium oxide at 999 and 909  $\text{cm}^{-1}$  in Confs. 3 and 4 respectively.
- The signals assigned to the S-OH bond stretching vibration of  $\text{HSO}_4^-$  shifts from 714 and 765  $\text{cm}^{-1}$  in the free state (Confs. 1 and 3) to 794 and 809  $\text{cm}^{-1}$  in the  $\text{VO}_2^+$ -complexing state (Confs. 2 and 4).
- The signal assigned to the free symmetrical S-O bond stretching of  $\text{HSO}_4^-$  is located at 964  $\text{cm}^{-1}$  (Conf. 1) and shifts to lower wavenumbers (839-854  $\text{cm}^{-1}$ ) when it complexes  $\text{VO}_2^+$  (Confs. 2 and 4).
- The V-O stretching signals do not show any significant shift.

### Case C:

- The signal assigned to the free symmetrical  $\text{H}_2\text{PO}_4^-$  bond stretching at about 796-806  $\text{cm}^{-1}$  is slightly blue-shifted in the bound state (823-835  $\text{cm}^{-1}$ , Confs. 3 and 4).
- The antisymmetrical signal of  $\text{H}_2\text{PO}_4^-$  in the unbound state located at 1004  $\text{cm}^{-1}$  is red-shifted when  $\text{H}_2\text{PO}_4^-$  only,  $\text{SO}_4^{2-}$  or both are bounded to  $\text{VO}_2^+$  (890-915  $\text{cm}^{-1}$ ).
- New signals appear when  $\text{H}_2\text{PO}_4^-$  complexes the vanadium oxide at 877 and 892  $\text{cm}^{-1}$  in Conf.3 and Conf.4 respectively.
- A new signal appears when  $\text{SO}_4^{2-}$  is bound to  $\text{VO}_2^+$  at 748  $\text{cm}^{-1}$  for Conf.2 and at 736  $\text{cm}^{-1}$  for Conf.4.
- The signals corresponding to the V-O symmetrical and antisymmetrical stretching vibrations do not show any significant shift.

### Case D:

- The signal assigned to the free symmetrical  $\text{H}_2\text{PO}_4^-$  bond stretching at about 814-820  $\text{cm}^{-1}$  is slightly blue-shifted in the bound state (831-848  $\text{cm}^{-1}$  Confs. 3 and 4).
- The antisymmetrical signal of  $\text{H}_2\text{PO}_4^-$  in the unbound state located at 976-982  $\text{cm}^{-1}$  shifts when  $\text{H}_2\text{PO}_4^-$  is bound to  $\text{VO}_2^+$  and is found at 910  $\text{cm}^{-1}$ .
- A new signal appears when  $\text{H}_2\text{PO}_4^-$  complexes the vanadium oxide at 892 and 879  $\text{cm}^{-1}$  in Confs. 3 and 4 respectively.
- A new signal appears when  $\text{SO}_4^{2-}$  is bound to  $\text{VO}_2^+$  at 620  $\text{cm}^{-1}$  for Conf.2 and at 723  $\text{cm}^{-1}$  for Conf.4.
- The signals corresponding to the V-O symmetrical and antisymmetrical stretching vibration do not show any significant shift.

## SUPPORTING INFORMATION

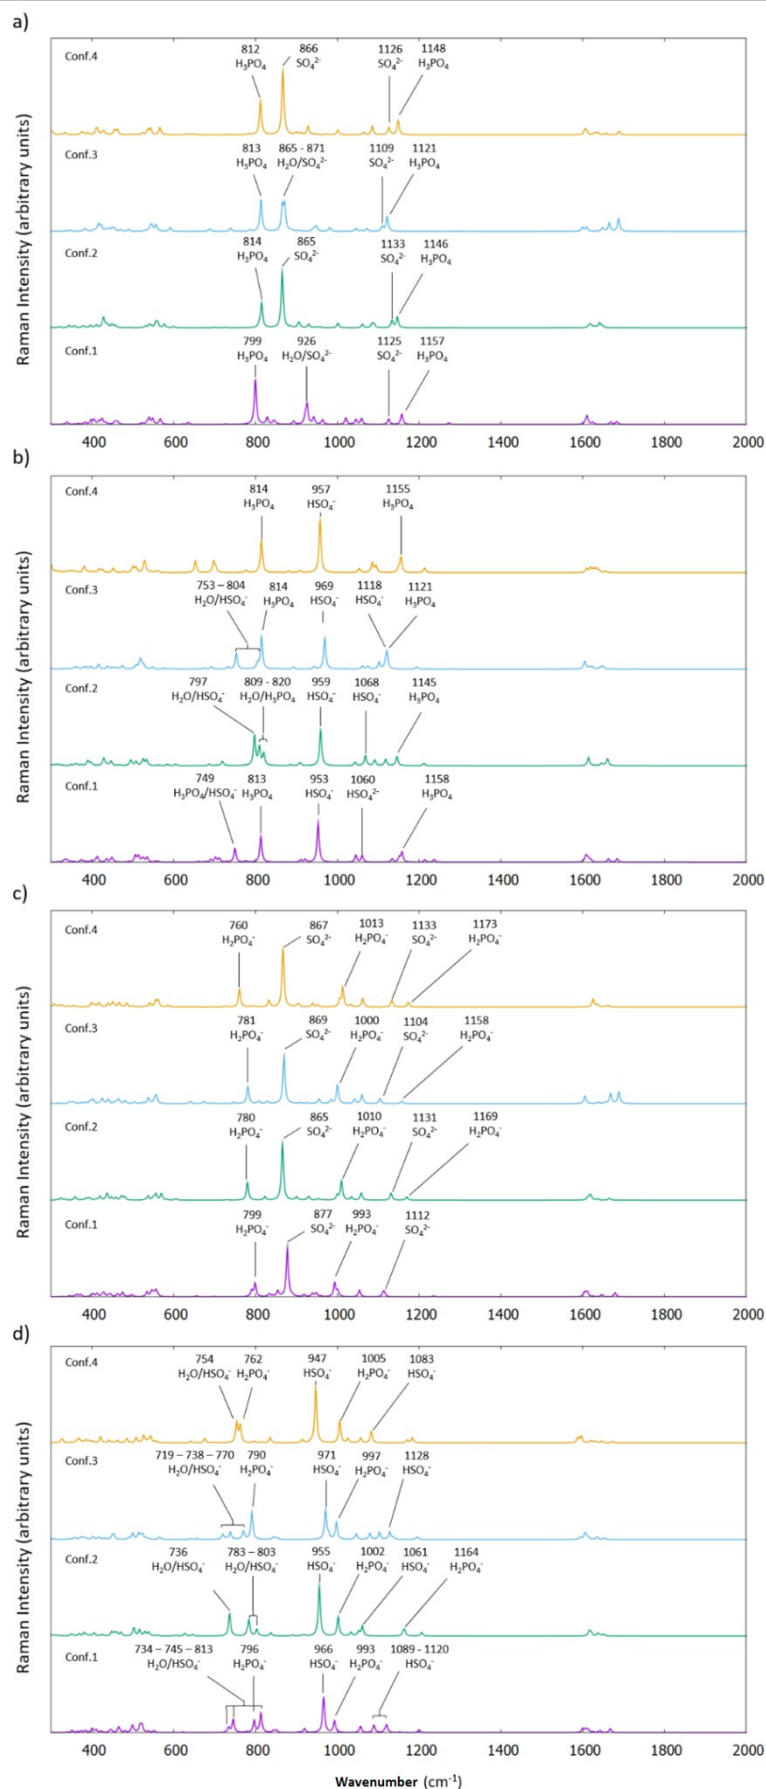

**Figure S5** **a)** Computational Raman Spectra in the 400-2000  $\text{cm}^{-1}$  range for the  $\text{V}^{2+}$  cation within the vicinity of  $\text{SO}_4^{2-}$  and  $\text{H}_3\text{PO}_4$ . **b)** The protonation of  $\text{SO}_4^{2-}$  is considered. **c)** The deprotonation of  $\text{H}_3\text{PO}_4$  is shown. **d)** The protonation of  $\text{SO}_4^{2-}$  and the first deprotonation of  $\text{H}_3\text{PO}_4$  are here represented. The most significant structures are selected on the basis of Scheme S1.

## SUPPORTING INFORMATION

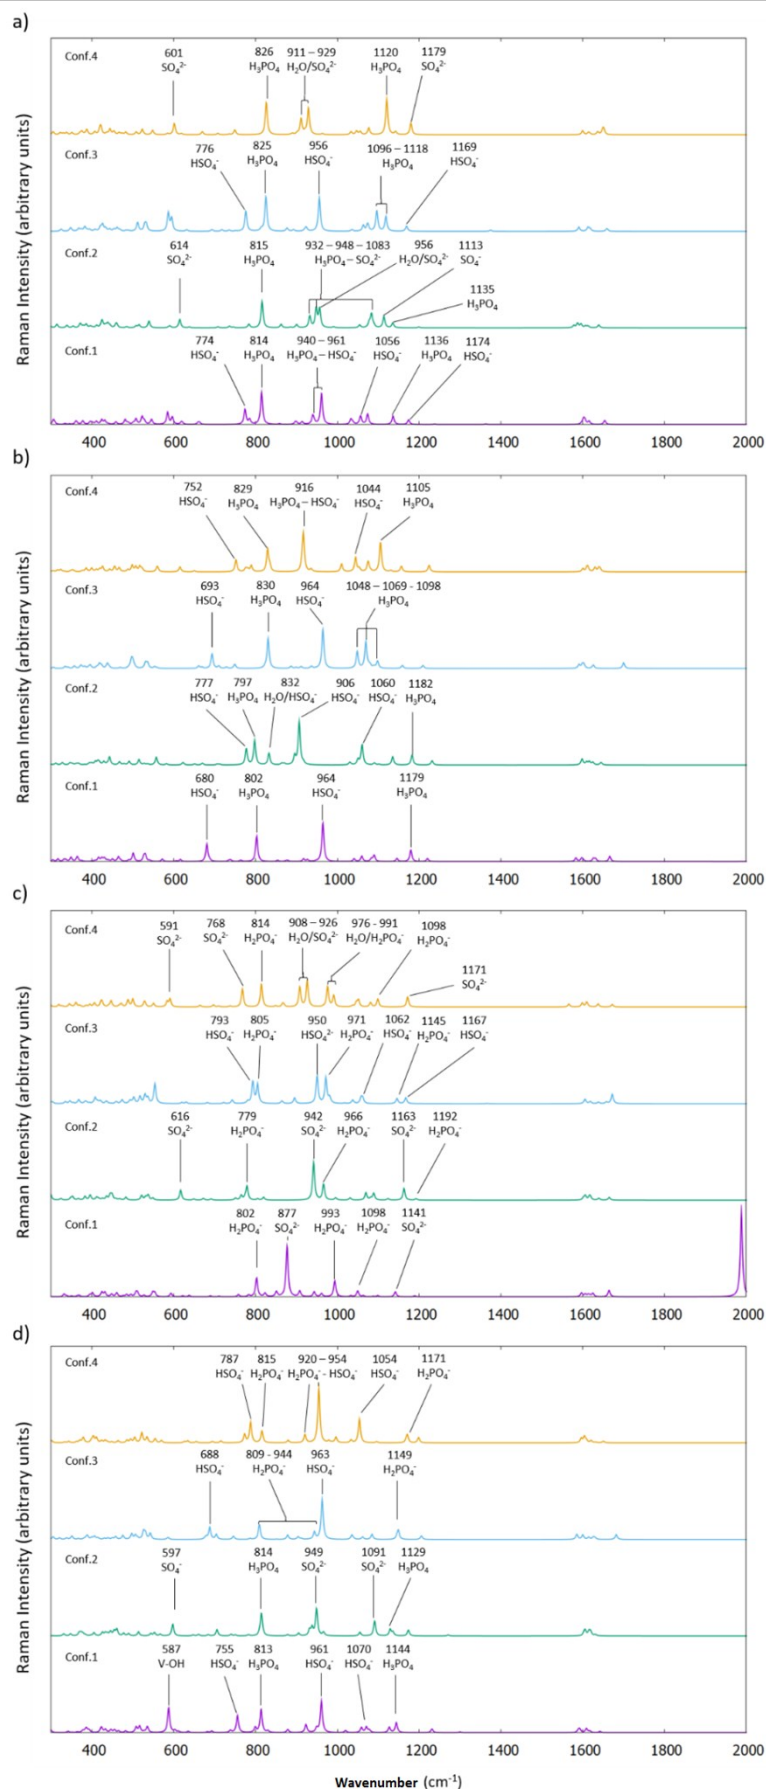

**Figure S4.** **a)** Computational Raman Spectra in the 400-2000  $\text{cm}^{-1}$  range for the  $\text{V}^{3+}$  cation within the vicinity of  $\text{SO}_4^{2-}$  and  $\text{H}_3\text{PO}_4$ . **b)** The protonation of  $\text{SO}_4^{2-}$  is considered. **c)** The deprotonation of  $\text{H}_3\text{PO}_4$  is shown. **d)** The protonation of  $\text{SO}_4^{2-}$  and the first deprotonation of  $\text{H}_3\text{PO}_4$  are here represented. The most significant structures are selected on the basis of Scheme S1.

# SUPPORTING INFORMATION

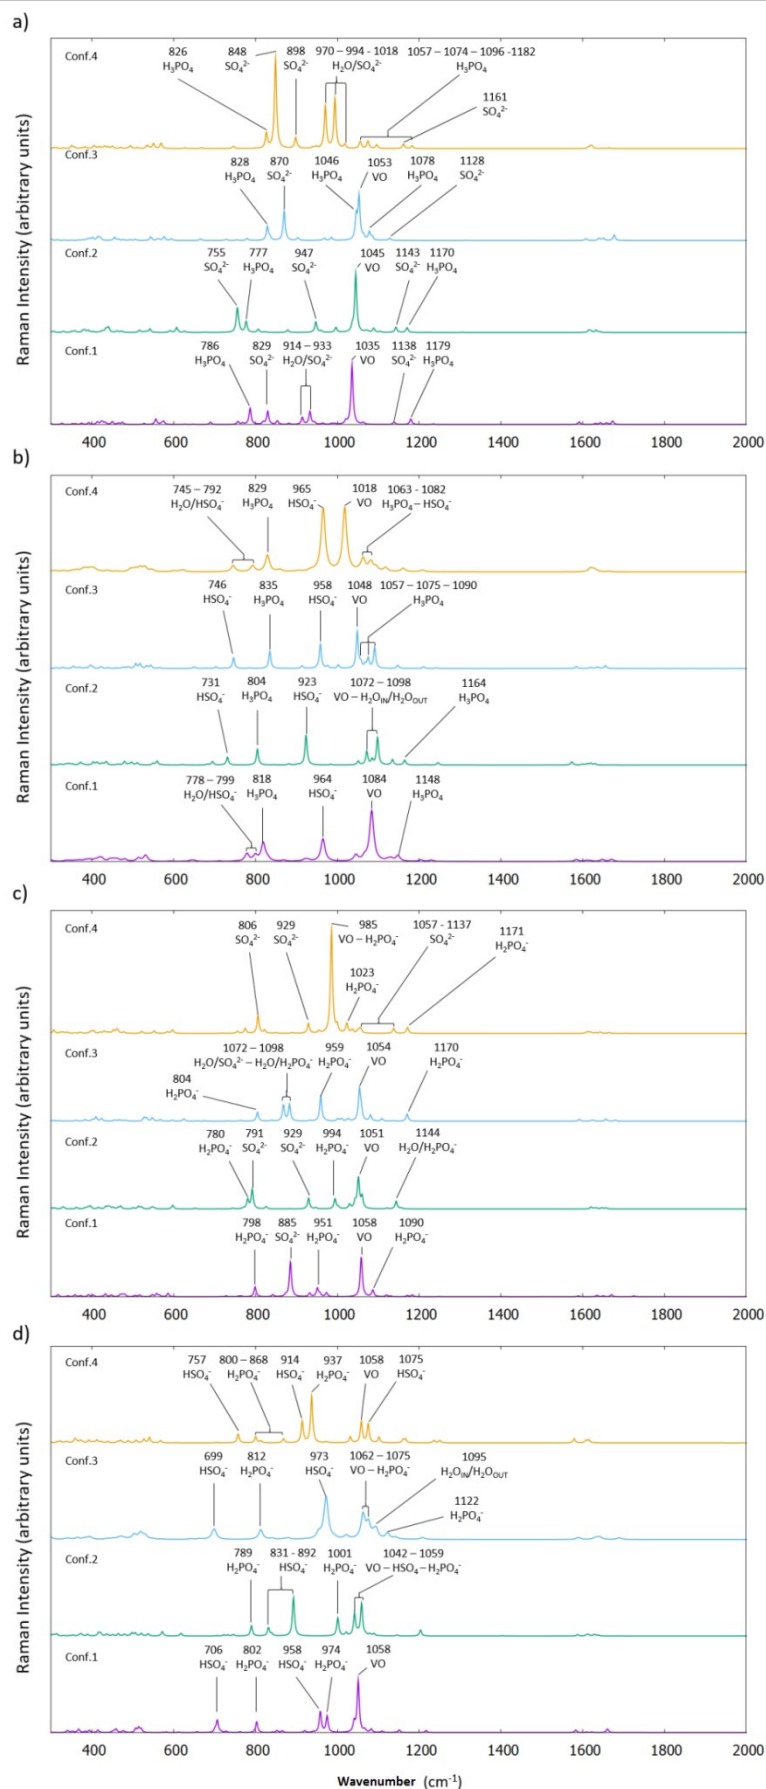

**Figure S6. a)** Computational Raman Spectra in the 400-2000  $\text{cm}^{-1}$  range for the  $\text{VO}^{2+}$  cation within the vicinity of  $\text{SO}_4^{2-}$  and  $\text{H}_3\text{PO}_4$ . **b)** The protonation of  $\text{SO}_4^{2-}$  is considered. **c)** The deprotonation of  $\text{H}_3\text{PO}_4$  is shown. **d)** The protonation of  $\text{SO}_4^{2-}$  and the first deprotonation of  $\text{H}_3\text{PO}_4$  are here represented. The most significant structures are selected on the basis of Scheme S1.

Figure 1 displays four panels (a, b, c, d) of Raman spectra for  $\text{VOPO}_4 \cdot x\text{H}_2\text{O}$  with different  $x$  values. Each panel shows four stacked spectra for different configurations (Conf. 1, 2, 3, 4). The x-axis represents Wavenumber ( $\text{cm}^{-1}$ ) from 400 to 2000, and the y-axis represents Raman Intensity (arbitrary units). The spectra are color-coded: Conf. 4 (yellow), Conf. 3 (orange), Conf. 2 (blue), and Conf. 1 (green). Peaks are labeled with their wavenumbers and corresponding chemical species.

**Panel (a)  $x=0.5$ :**

- Conf. 4: 692 ( $\text{H}_2\text{PO}_4^-$ ), 747 ( $\text{SO}_4^{2-}$ ), 824 ( $\text{H}_2\text{PO}_4^-$ ), 951-960 ( $\text{VO}-\text{SO}_4^{2-}$ ), 1009 ( $\text{VO}-\text{H}_2\text{PO}_4^-$ ), 1091-1168 ( $\text{SO}_4^{2-}$ ), 1203 ( $\text{H}_2\text{PO}_4^-$ ).
- Conf. 3: 744 ( $\text{HSO}_4^-$ ), 848 ( $\text{H}_2\text{PO}_4^-$ ), 898 ( $\text{VO}$ ), 922 ( $\text{H}_2\text{PO}_4^-$ ), 933 ( $\text{H}_2\text{PO}_4^-$ ), 1084-1190 ( $\text{HSO}_4^-$ ), 1118 ( $\text{H}_2\text{PO}_4^-$ ).
- Conf. 2: 768 ( $\text{SO}_4^{2-}$ ), 812 ( $\text{H}_2\text{PO}_4^-$ ), 946 ( $\text{VO}$ ), 955 ( $\text{SO}_4^{2-}$ ), 1010 ( $\text{VO}$ ), 1093-1160 ( $\text{SO}_4^{2-}$ ), 1144 ( $\text{H}_2\text{PO}_4^-$ ).
- Conf. 1: 813 ( $\text{H}_2\text{PO}_4^-$ ), 819 ( $\text{V-OH}$ ), 954-958 ( $\text{H}_2\text{O}/\text{HSO}_4^-$ ), 1012 ( $\text{VO}$ ), 1052-1169 ( $\text{HSO}_4^-$ ), 1142 ( $\text{H}_2\text{PO}_4^-$ ).

**Panel (b)  $x=1$ :**

- Conf. 4: 839 ( $\text{HSO}_4^-$ ), 909 ( $\text{H}_2\text{PO}_4^-$ ), 964 ( $\text{VO}-\text{H}_2\text{O}/\text{HSO}_4^-$ ), 1030 ( $\text{VO}$ ), 1082 ( $\text{H}_2\text{PO}_4^-$ ), 1091-1237 ( $\text{HSO}_4^-$ ).
- Conf. 3: 765 ( $\text{HSO}_4^-$ ), 853 ( $\text{H}_2\text{PO}_4^-$ ), 960-968 ( $\text{H}_2\text{O}/\text{HSO}_4^-$ ), 980 ( $\text{VO}$ ), 989-999 ( $\text{H}_2\text{PO}_4^-$ ), 1051 ( $\text{VO}$ ), 1113-1197 ( $\text{HSO}_4^-$ ).
- Conf. 2: 794 ( $\text{HSO}_4^-$ ), 807 ( $\text{H}_2\text{PO}_4^-$ ), 948 ( $\text{VO}$ ), 1025 ( $\text{H}_2\text{O}/\text{H}_2\text{PO}_4^-$ ), 1030 ( $\text{VO}$ ), 1087 ( $\text{HSO}_4^-$ ), 1135 ( $\text{H}_2\text{PO}_4^-$ ), 1240 ( $\text{HSO}_4^-$ ).
- Conf. 1: 714 ( $\text{HSO}_4^-$ ), 814 ( $\text{H}_2\text{PO}_4^-$ ), 964 ( $\text{HSO}_4^-$ ), 974 ( $\text{VO}$ ), 1046 ( $\text{VO}$ ), 1086-1189 ( $\text{HSO}_4^-$ ), 1148 ( $\text{H}_2\text{PO}_4^-$ ).

**Panel (c)  $x=1.5$ :**

- Conf. 4: 736 ( $\text{SO}_4^{2-}$ ), 835-892-922 ( $\text{H}_2\text{PO}_4^-$ ), 950-956 ( $\text{VO}-\text{SO}_4^{2-}$ ), 1011 ( $\text{VO}$ ), 1110-1160 ( $\text{SO}_4^{2-}$ ), 1149 ( $\text{H}_2\text{PO}_4^-$ ).
- Conf. 3: 785 ( $\text{HSO}_4^-$ ), 823-877-898 ( $\text{H}_2\text{PO}_4^-$ ), 959 ( $\text{HSO}_4^-$ ), 975-996 ( $\text{VO}$ ), 1073-1166 ( $\text{HSO}_4^-$ ), 1161 ( $\text{H}_2\text{PO}_4^-$ ).
- Conf. 2: 748 ( $\text{SO}_4^{2-}$ ), 806 ( $\text{H}_2\text{PO}_4^-$ ), 890-915 ( $\text{VO}-\text{H}_2\text{PO}_4^-$ ), 949 ( $\text{SO}_4^{2-}$ ), 991 ( $\text{VO}$ ), 1157 ( $\text{H}_2\text{PO}_4^-$ ), 1089-1163 ( $\text{SO}_4^{2-}$ ).
- Conf. 1: 796 ( $\text{HSO}_4^-$ ), 938 ( $\text{H}_2\text{PO}_4^-$ ), 957-989 ( $\text{HSO}_4^-$ ), 1004 ( $\text{VO}$ ), 1076-1176 ( $\text{HSO}_4^-$ ), 1111 ( $\text{H}_2\text{PO}_4^-$ ).

**Panel (d)  $x=2$ :**

- Conf. 4: 723 ( $\text{SO}_4^{2-}$ ), 831-879-911 ( $\text{H}_2\text{PO}_4^-$ ), 935 ( $\text{SO}_4^{2-}$ ), 961-1018 ( $\text{VO}$ ), 1071-1155 ( $\text{SO}_4^{2-}$ ), 1169 ( $\text{H}_2\text{PO}_4^-$ ).
- Conf. 3: 780 ( $\text{HSO}_4^-$ ), 848-892-910 ( $\text{H}_2\text{PO}_4^-$ ), 940-959 ( $\text{H}_2\text{O}/\text{HSO}_4^-$ ), 981-1029 ( $\text{VO}$ ), 1068-1165 ( $\text{HSO}_4^-$ ), 1109 ( $\text{H}_2\text{PO}_4^-$ ).
- Conf. 2: 620 ( $\text{SO}_4^{2-}$ ), 820 ( $\text{H}_2\text{PO}_4^-$ ), 950 ( $\text{SO}_4^{2-}$ ), 976-982 ( $\text{H}_2\text{PO}_4^-$ ), 1023 ( $\text{H}_2\text{O}/\text{H}_2\text{PO}_4^-$ ), 1036 ( $\text{VO}$ ), 1085-1165 ( $\text{SO}_4^{2-}$ ), 1096 ( $\text{H}_2\text{PO}_4^-$ ).
- Conf. 1: 781 ( $\text{HSO}_4^-$ ), 814 ( $\text{H}_2\text{PO}_4^-$ ), 958 ( $\text{HSO}_4^-$ ), 966-1007 ( $\text{VO}$ ), 1121 ( $\text{H}_2\text{PO}_4^-$ ), 1057-1172 ( $\text{HSO}_4^-$ ).

## SUPPORTING INFORMATION

### 2000-4000 $\text{cm}^{-1}$

**V<sup>2+</sup>.** All possible configurations for V<sup>2+</sup> include H-bonds between the H<sub>2</sub>O molecules of the first solvation shell and the oxygens of the sulfate/bisulfate group in the second solvation shell (see Scheme 1 of the manuscript). As shown in Figure S9, the O-H stretching vibration of the sulfate group refers to a signal between 3000-3200  $\text{cm}^{-1}$  in the Raman spectra. However, we noticed that when H<sub>3</sub>PO<sub>4</sub> is present in the first coordination shell the signal appears to be shifted to 2900-3100  $\text{cm}^{-1}$ . Passing from the sulfate to the bisulfate group, this signal shifts to higher wavenumbers producing a signal at 3300-3500  $\text{cm}^{-1}$ . In the same wavenumber range also another signal appears from the H-bonds formed between the H<sub>2</sub>O molecules outside the first solvation shell and the sulfate or bisulfate group.

The H-bonding between H<sub>2</sub>O molecules of the first shell and the oxygens of H<sub>3</sub>PO<sub>4</sub> absorbs as well in the range of 3400-3500  $\text{cm}^{-1}$ . However, when the phosphoric acid is deprotonated to H<sub>2</sub>PO<sub>4</sub><sup>-</sup> this signal shifts towards lower wavenumbers (3000-3300  $\text{cm}^{-1}$ ). Moreover, if the H-bonding occurs between a hydrogen bound to a phosphate group and an oxygen of H<sub>2</sub>O from the first solvation shell of, the O-H stretching vibration appears at 2900  $\text{cm}^{-1}$ .

Sulfate and phosphate groups interact with each other when both are outside the first solvation shell of vanadium. The signal coming from this interaction is affected by the protonation of the two acids. The interaction between SO<sub>4</sub><sup>2-</sup> and H<sub>3</sub>PO<sub>4</sub> generates a peak at 2200  $\text{cm}^{-1}$  (Scheme 1a of the manuscript). In contrast, in the case of HSO<sub>4</sub><sup>-</sup> and H<sub>3</sub>PO<sub>4</sub> we observe a signal at 3300  $\text{cm}^{-1}$ . In the case of SO<sub>4</sub><sup>-</sup> and H<sub>2</sub>PO<sub>4</sub><sup>-</sup> the H-bond formed between the phosphate hydrogen and sulfate corresponds to a signal at 2900  $\text{cm}^{-1}$ . Last, if HSO<sub>4</sub><sup>-</sup> interacts with H<sub>2</sub>PO<sub>4</sub><sup>-</sup> the signal produced by their interaction is at 3400  $\text{cm}^{-1}$ . Raman wavenumbers at about 3600  $\text{cm}^{-1}$  correspond to the O-H stretching of the HSO<sub>4</sub><sup>-</sup> (Scheme 1b and 1d of the manuscript), while the ones at above 3700  $\text{cm}^{-1}$  can be assigned to the internal O-H stretching of the H<sub>2</sub>O molecules.

**V<sup>3+</sup>.** As described in the manuscript, the configurations of V<sup>3+</sup> show H-bonds between the H<sub>2</sub>O molecules of the first solvation shell and the oxygens of the sulfate group (see Scheme 2 of the manuscript). As shown in Figure S9, The O-H stretching with the oxygen from the sulfate group produces a signal at 3000-3200  $\text{cm}^{-1}$  in the Raman spectra. In this case however we did not notice any shift due to the presence of the H<sub>3</sub>PO<sub>4</sub> in the first coordination shell. Passing to the bisulfate group, this signal covers a larger range of wavenumbers going from 3000 up to 3500  $\text{cm}^{-1}$ . As for the V<sup>2+</sup> case, in the range of 3400-3500  $\text{cm}^{-1}$  a signal appears coming from the H-bonds formed between the H<sub>2</sub>O molecules outside the first solvation shell and the sulfate or bisulfate group.

In contrast to V<sup>2+</sup>, the signals coming from the H-bonding between H<sub>2</sub>O molecules of the first shell and the H<sub>3</sub>PO<sub>4</sub> are observed in two different possible ranges. If the bonding takes place between the water hydrogens and the oxygen from the deprotonated phosphoric acid, the signal appears in the range of 3000-3300  $\text{cm}^{-1}$ . On the other hand, if the H-bonding involves an oxygen from the protonated H<sub>3</sub>PO<sub>4</sub>, the signal appears in the range of 3400-3600  $\text{cm}^{-1}$ . When considering H<sub>2</sub>PO<sub>4</sub><sup>-</sup>, H-bonding occurs only between unprotonated oxygens and H<sub>2</sub>O of the first solvation shell and the corresponding signals can span a very large range of wavenumbers, 2400-3300  $\text{cm}^{-1}$ .

Finally, we noticed that the interaction between sulfate and phosphate groups also in this case varies depending on the sulfate-phosphate pair considered. The interaction between SO<sub>4</sub><sup>2-</sup> and H<sub>3</sub>PO<sub>4</sub> generates a peak at 2800  $\text{cm}^{-1}$ . In the case of HSO<sub>4</sub><sup>-</sup> and H<sub>3</sub>PO<sub>4</sub> we observe a signal at 2600  $\text{cm}^{-1}$ . In the case of SO<sub>4</sub><sup>-</sup> and H<sub>2</sub>PO<sub>4</sub><sup>-</sup> the H-bond formed between the phosphate hydrogen and sulfate corresponds to a signal of 3200  $\text{cm}^{-1}$ . Last, if HSO<sub>4</sub><sup>-</sup> interacts with H<sub>2</sub>PO<sub>4</sub><sup>-</sup> the signal produced by their interaction appears at 3100  $\text{cm}^{-1}$ .

**VO<sup>2+</sup>.** All configuration of VO<sup>2+</sup> (except for Confs 2 (Scheme 3.a of the manuscript), 4 (Scheme 3.c) and 2 (Scheme 3.d)) exhibit H-Bonds between the water molecules present in the first solvation shell of vanadium and the oxygen atoms of the sulfate/bisulfate group. As shown in Figure S10, the O-H stretching vibration arising from the sulfate group refers to a signal that span a broad range of wavenumbers, 2400-3100  $\text{cm}^{-1}$ . However, as in the case of V<sup>2+</sup>, we noticed that when H<sub>3</sub>PO<sub>4</sub>/H<sub>2</sub>PO<sub>4</sub><sup>-</sup> is in the first coordination shell the signal appears to be shifted to 2200-2400  $\text{cm}^{-1}$ . Again, as for the V<sup>2+</sup> case, passing from the sulfate to the bisulfate group, this signal shifts to higher wavenumbers, 3300-3500  $\text{cm}^{-1}$ . Moreover, also for the bisulfate, when H<sub>3</sub>PO<sub>4</sub>/H<sub>2</sub>PO<sub>4</sub><sup>-</sup> is in the first coordination shell this signal moves to lower wavenumbers 3100-3200  $\text{cm}^{-1}$ .

The signal due to the H-bonds formed between the H<sub>2</sub>O molecules outside the first solvation shell and the sulfate or bisulfate group is different, in contrast with V<sup>2+</sup> and V<sup>3+</sup> cases. The first falls in the 3200-3500  $\text{cm}^{-1}$  range, while the second in the 3500-3600  $\text{cm}^{-1}$  range of the Raman spectra.

The signal coming from the H-bonding between H<sub>2</sub>O molecules of the first shell and the H<sub>3</sub>PO<sub>4</sub> or H<sub>2</sub>PO<sub>4</sub><sup>-</sup>, as in the V<sup>3+</sup> case, fall in two possible ranges. On one hand, if the H-bonding involves a protonated H<sub>3</sub>PO<sub>4</sub>/ H<sub>2</sub>PO<sub>4</sub><sup>-</sup> oxygen the signal falls in the 3400-3600  $\text{cm}^{-1}$  range. On the other hand, if the bonding takes place between the water hydrogens and the unprotonated oxygen the signal falls in the 3000-3500  $\text{cm}^{-1}$  wavenumbers range, in the case of H<sub>3</sub>PO<sub>4</sub>, and in the lower 2300-3200  $\text{cm}^{-1}$  range in the case of H<sub>2</sub>PO<sub>4</sub><sup>-</sup>.

Sulfate and phosphate groups interact when both are outside the first solvation shell of vanadium. The signal coming from this interaction changes in correspondence of the protonation of the two acids. The interaction between SO<sub>4</sub><sup>2-</sup> and H<sub>3</sub>PO<sub>4</sub> generates a peak at 2400  $\text{cm}^{-1}$ . In the case of HSO<sub>4</sub><sup>-</sup> and H<sub>3</sub>PO<sub>4</sub>, we observe a signal at 3200  $\text{cm}^{-1}$ . In the presence of SO<sub>4</sub><sup>-</sup> and H<sub>2</sub>PO<sub>4</sub><sup>-</sup>, the H-bond formed between the phosphate hydrogen and sulfate corresponds to a signal of 3100  $\text{cm}^{-1}$ . Last, if HSO<sub>4</sub><sup>-</sup> interacts with H<sub>2</sub>PO<sub>4</sub><sup>-</sup> the signal produced by their interaction is at 3500  $\text{cm}^{-1}$ .

## SUPPORTING INFORMATION

---

In contrast with the previous cases, we also observed some peaks corresponding to H-bonding between H<sub>2</sub>O molecules or H<sub>3</sub>PO<sub>4</sub>/H<sub>2</sub>PO<sub>4</sub><sup>-</sup> and the oxygen of VO<sup>2+</sup>. The corresponding signals were found at 3500 cm<sup>-1</sup> in the case of H<sub>2</sub>O, 3300-3500 cm<sup>-1</sup> in the case of H<sub>3</sub>PO<sub>4</sub> and 3650 cm<sup>-1</sup> for H<sub>2</sub>PO<sub>4</sub><sup>-</sup>.

**VO<sub>2</sub><sup>+</sup>.** The VO<sub>2</sub><sup>+</sup> case is the most particular one. In fact, several of the most stable structures changed the initial protonation arrangement during the geometry optimization (Scheme 4 of the manuscript). This gave rise to different combination of sulfate, bisulfate phosphoric acid and triphosphate pairs, as well as formation of H<sub>3</sub>O<sup>+</sup> ions. Moreover, we found that several peaks correspond to combined H-bond stretching vibrations. In this framework, it was not possible to identify a common pattern in the spectra of the most stable V(V) configurations, as it was done in the previous cases.

## SUPPORTING INFORMATION

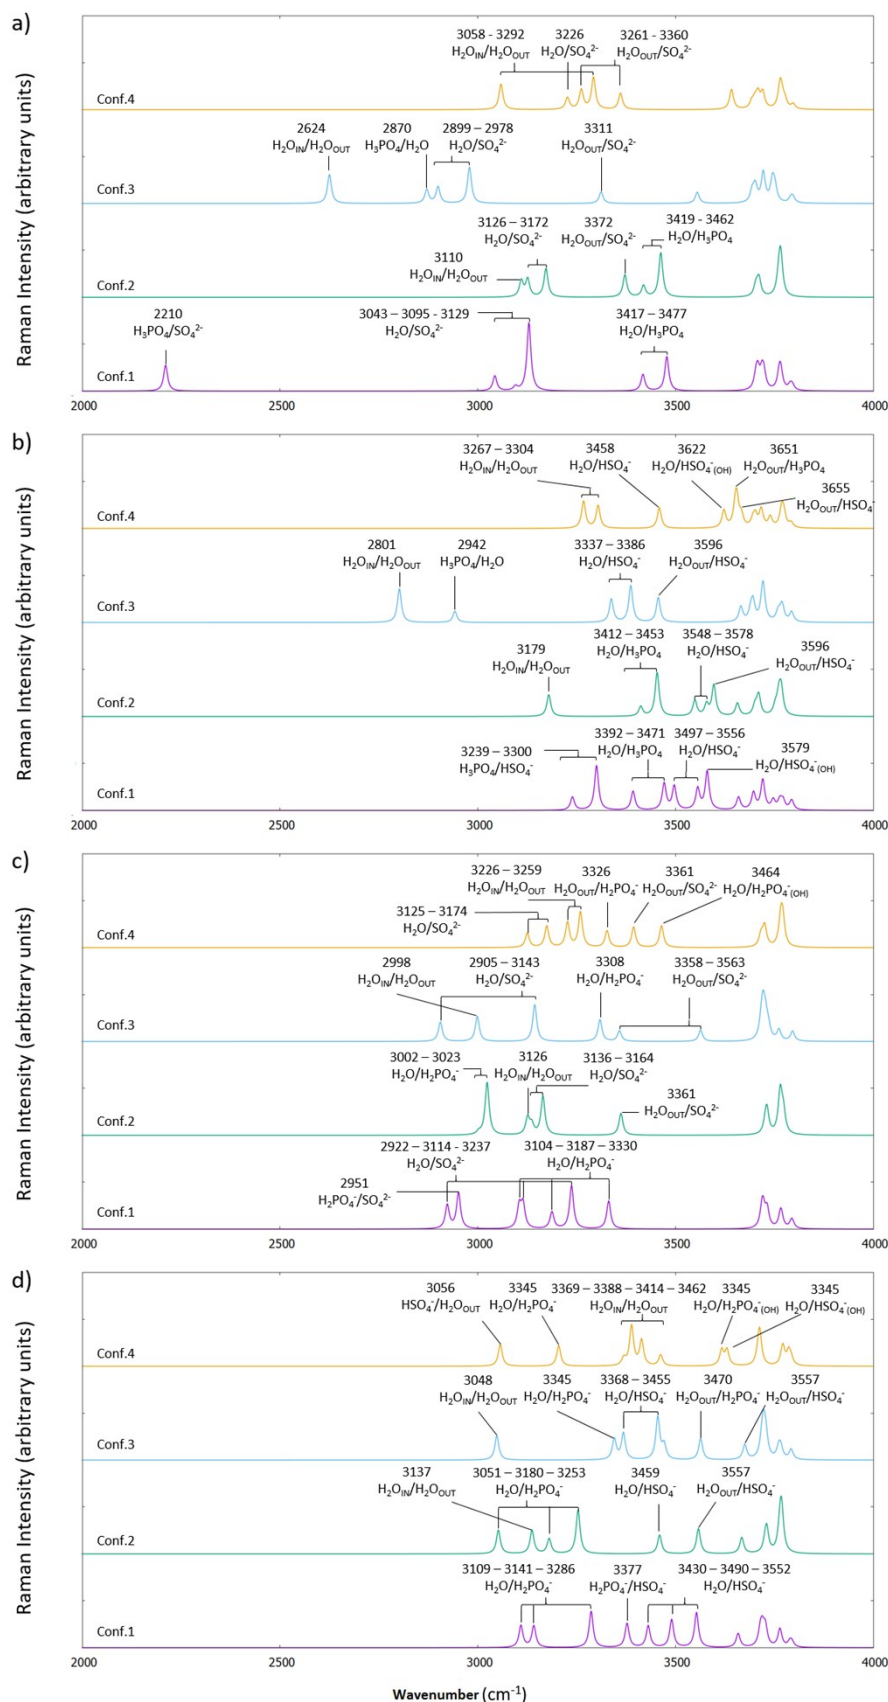

**Figure S8. a)** Computational Raman Spectra in the 2000-4000  $\text{cm}^{-1}$  range for the  $\text{V}^{2+}$  cation within the vicinity of  $\text{SO}_4^{2-}$  and  $\text{H}_3\text{PO}_4$ . **b)** The protonation of  $\text{SO}_4^{2-}$  is considered. **c)** The deprotonation of  $\text{H}_3\text{PO}_4$  is shown. **d)** The protonation of  $\text{SO}_4^{2-}$  and the first deprotonation of  $\text{H}_3\text{PO}_4$  are here represented. The most significant structures are selected on the basis of Scheme S1.

## SUPPORTING INFORMATION

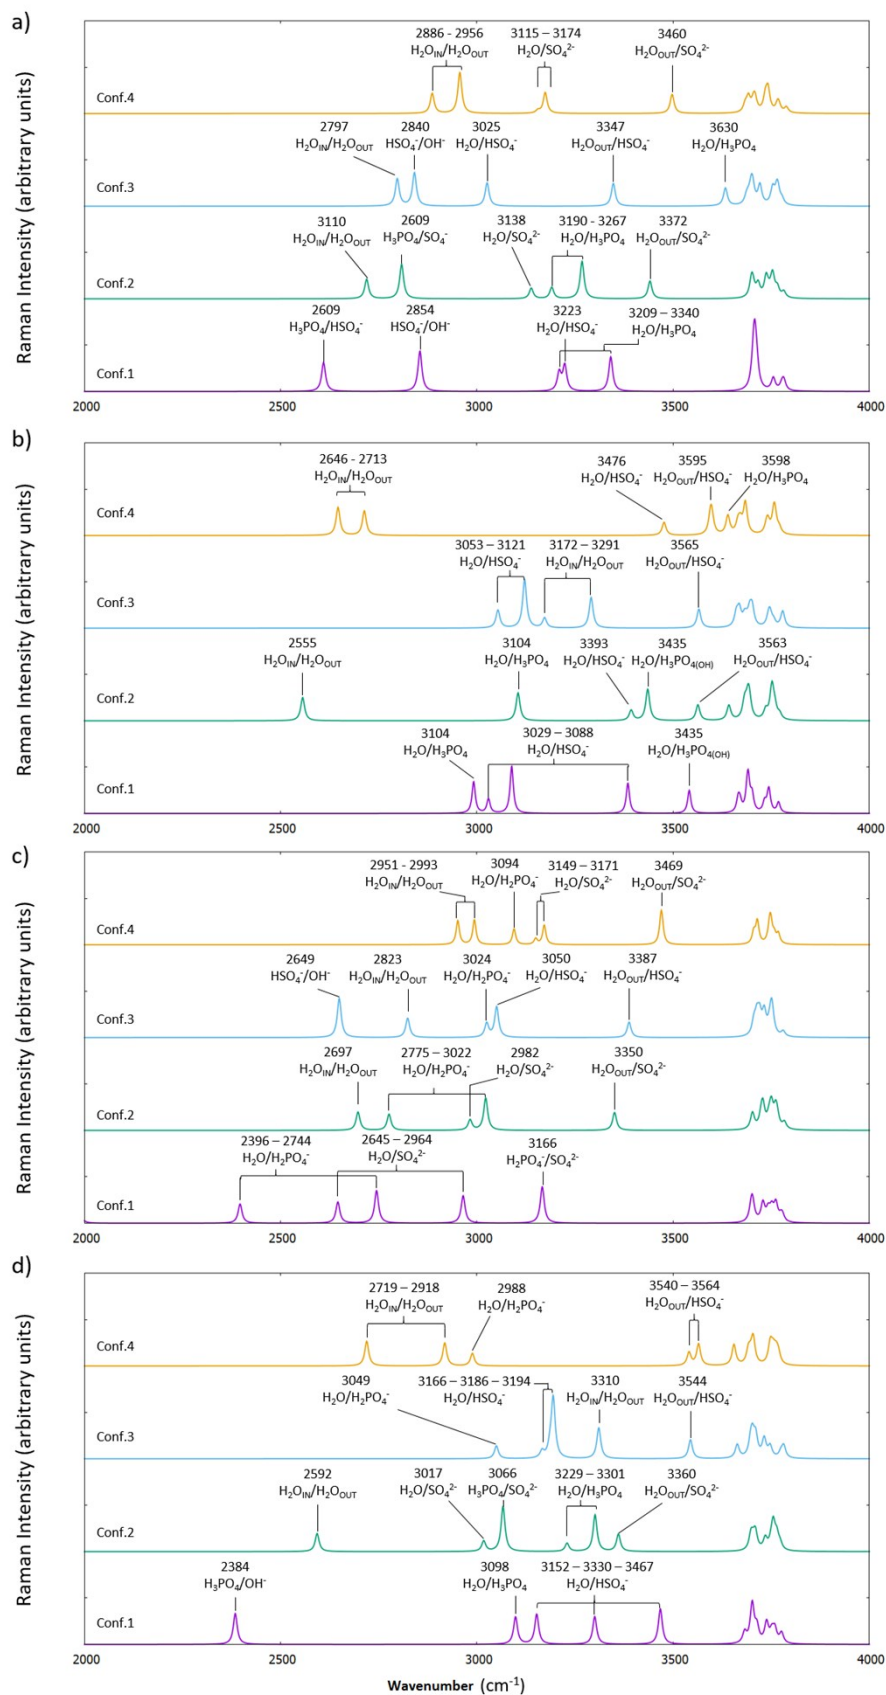

**Figure S9. a)** Computational Raman Spectra in the 2000-4000  $\text{cm}^{-1}$  range for the  $\text{V}^{3+}$  cation within the vicinity of  $\text{SO}_4^{2-}$  and  $\text{H}_3\text{PO}_4$ . **b)** The protonation of  $\text{SO}_4^{2-}$  is considered. **c)** The deprotonation of  $\text{H}_3\text{PO}_4$  is shown. **d)** The protonation of  $\text{SO}_4^{2-}$  and the first deprotonation of  $\text{H}_3\text{PO}_4$  are here represented. The most significant structures are selected on the basis of Scheme S1.

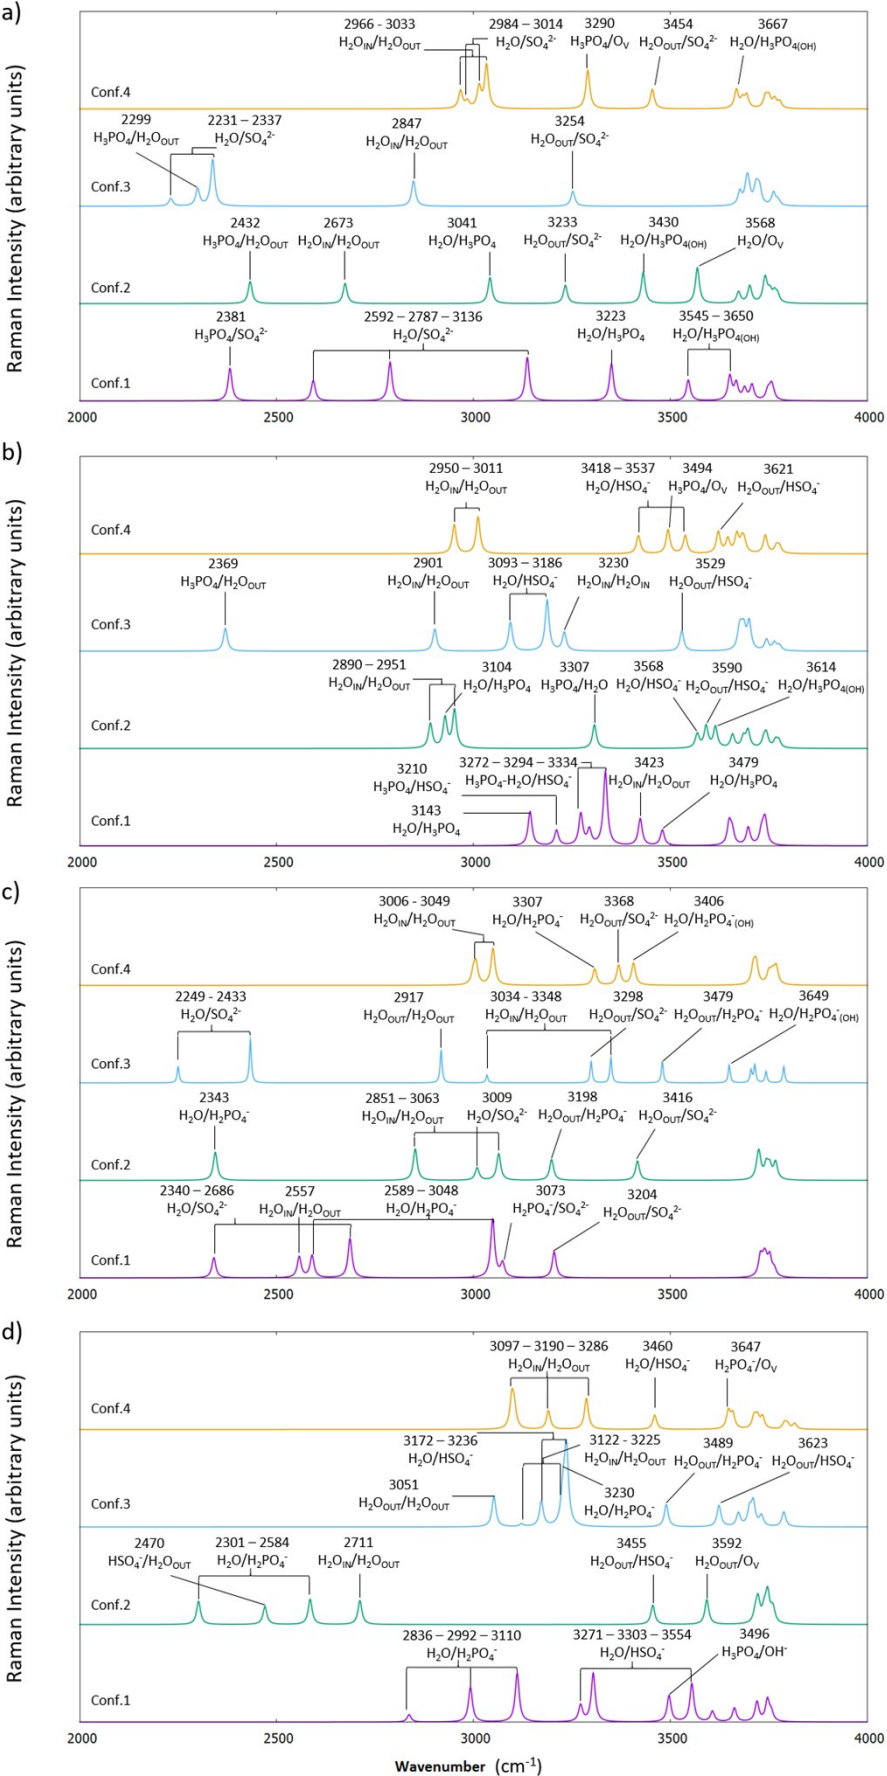

**Figure S10.** **a)** Computational Raman Spectra in the 2000-4000  $\text{cm}^{-1}$  range for the  $\text{VO}^{2+}$  cation within the vicinity of  $\text{SO}_4^{2-}$  and  $\text{H}_3\text{PO}_4$ . **b)** The protonation of  $\text{SO}_4^{2-}$  is considered. **c)** The deprotonation of  $\text{H}_3\text{PO}_4$  is shown. **d)** The protonation of  $\text{SO}_4^{2-}$  and the first deprotonation of  $\text{H}_3\text{PO}_4$  are here represented. The most significant structures are selected on the basis of Scheme S1.

## SUPPORTING INFORMATION

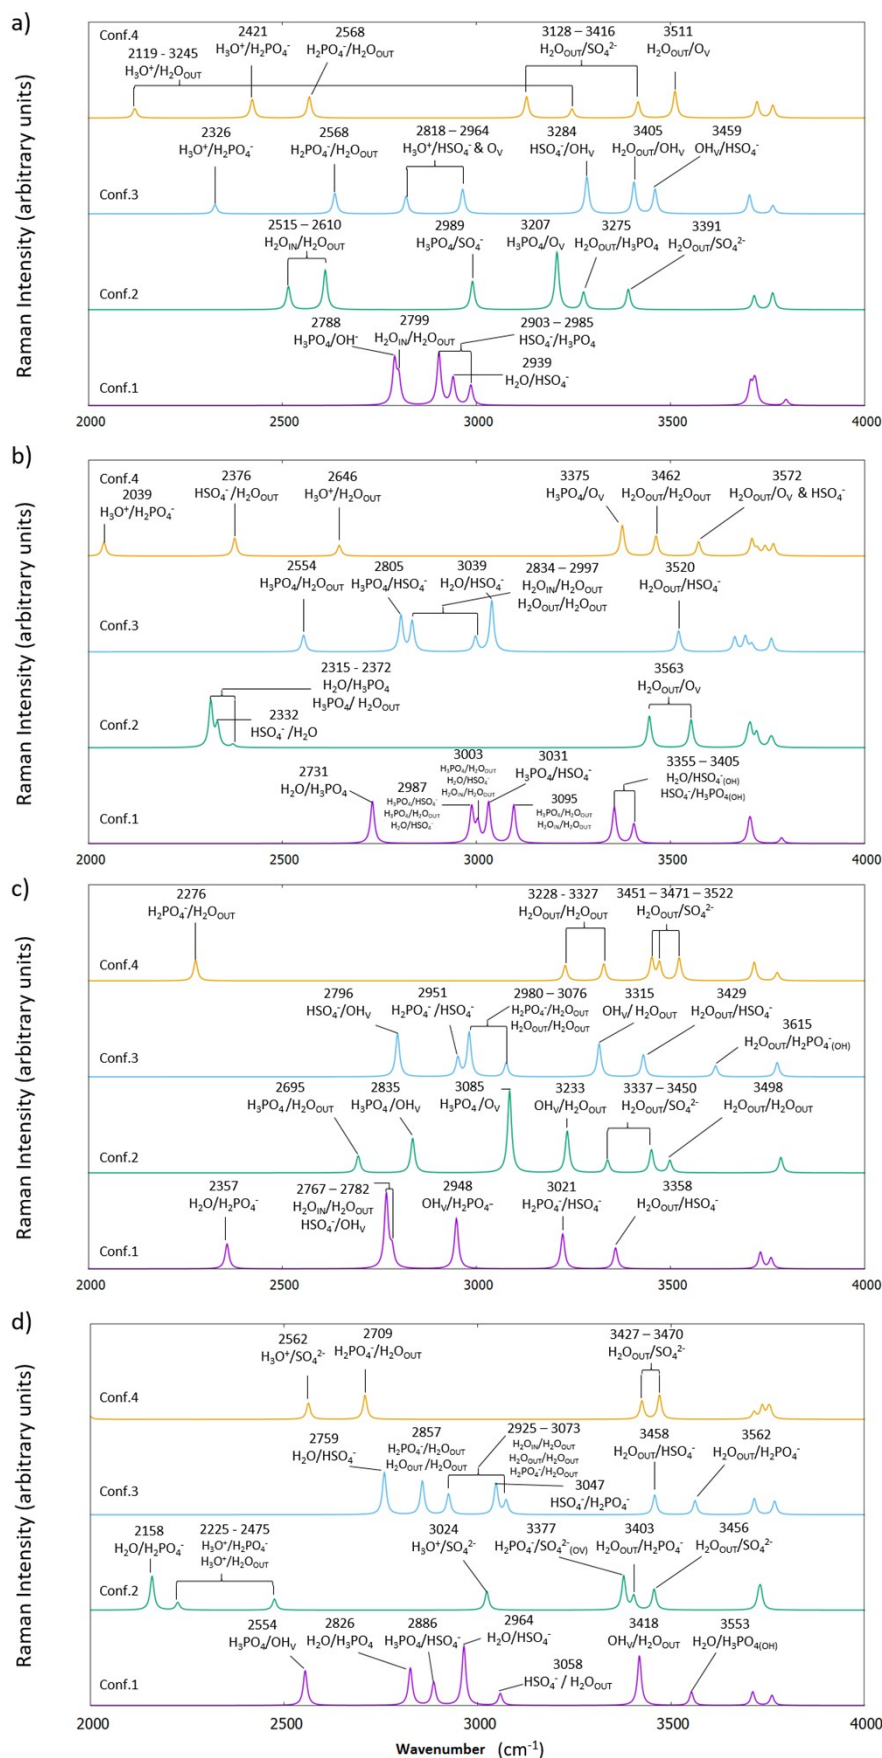

**Figure S11.** a) Computational Raman Spectra in the 2000-4000  $\text{cm}^{-1}$  range for the  $\text{VO}_2^+$  cation within the vicinity of  $\text{SO}_4^{2-}$  and  $\text{H}_3\text{PO}_4$ . b) The protonation of  $\text{SO}_4^{2-}$  is considered. c) The deprotonation of  $\text{H}_3\text{PO}_4$  is shown. d) The protonation of  $\text{SO}_4^{2-}$  and the first deprotonation of  $\text{H}_3\text{PO}_4$  are here represented. The most significant structures are selected on the basis of Scheme S1.

## SUPPORTING INFORMATION

---

### References

- 1 A. D. Becke, *J. Chem. Phys.*, 1993, **98**, 1372–1377.
- 2 Aleksandr V. Marenich, Christopher J. Cramer, Donald G. Truhlar, *J. Phys. Chem. B*, 2009, **113**, 6378–6396.
- 3 F. Sepehr, S. J. Paddison, *Chem. Phys. Lett.*, 2013, **585**, 53–58.
- 4 M. Frisch, G. Trucks, H. Schlegel, G. Scuseria, M. Robb, J. Cheeseman, J. Montgomery, T. Vreven, K. Kudin, J. Burant, et al., *Gaussian 03, Revision C.02*, n.d.
- 5 M. Bon, T. Laino, A. Curioni, M. Parrinello, *J. Phys. Chem. C*, 2016, **120**, 10791–10798.
- 6 M. Skyllas-Kazacos, L. Cao, M. Kazacos, N. Kausar, A. Mousa, *ChemSusChem*, 2016, **9**, 1521–1543.
- 7 G. Socrates, *Infrared and Raman Characteristic Group Frequencies: Tables and Charts*, John Wiley & Sons, 2001.

### Author Contributions

Fabio J. Oldenburg and Marta Bon share the first authorship and carried out the experimental analysis and the DFT-calculations, respectively. Daniele Perego supported on the experimental side, in particular with measuring the electrochemical impedance spectroscopy on all half-cells and helped editing the manuscript. Daniela Polino supported on the theoretical side with calculating and interpreting the theoretical Raman-spectra that were used to verify the experimental analysis. Teodoro Laino, Thomas J. Schmidt and Lorenz Gubler guided and supported the work from the administrative side and supervised the work of Marta Bon and Fabio Oldenburg, respectively. They gave valuable advice for interpreting the data and writing the manuscript. They further acquired the required funding and defined the framework of this project.
